# Supplementary material
Source: PubMed Central journal article supplement (PMC7184656)
Supplement: UEG889763_Supplemetal_Material.pdf [file UEG889763_Supplemetal_Material.pdf]

**Supplementary Table 1. Diagnoses of infections with related ICD 10-codes included as viral infections**

| Diagnoses                                                           | ICD-10                |
|---------------------------------------------------------------------|-----------------------|
| Herpes virus                                                        | B00-B02               |
| Cytomegalovirus                                                     | B25                   |
| Epstein–Barr virus                                                  | B27                   |
| Acute viral hepatitis unspecified                                   | B17.9; B19            |
| Other viral infections of skin, oral tissue and subcutaneous tissue | B03-B09; B26; B30-B34 |

**Supplementary Table 2.** Incidence rates of acute extra-intestinal SVI according to age, gender, IBD subtype and exposure to IBD drugs

|                                         | Person-years | Observed cases (n) | Incidence rates per 1000 person-years | 95% CI    |
|-----------------------------------------|--------------|--------------------|---------------------------------------|-----------|
| All patients                            | 15,383       | 31                 | 2.02                                  | 1.95-2.08 |
| Age class <sup>a</sup>                  |              |                    |                                       |           |
| At least 18 and less than 35 years      | 6311         | 19                 | 3.01                                  | 2.9-3.1   |
| 35 to 65 years                          | 7834         | 10                 | 1.28                                  | 1.20-1.35 |
| More than 65 years                      | 1238         | 2                  | 1.62                                  | 1.41-1.82 |
| Gender                                  |              |                    |                                       |           |
| Male                                    | 6720         | 14                 | 2.08                                  | 1.99-2.18 |
| Female                                  | 8663         | 17                 | 1.96                                  | 1.88-2.05 |
| IBD subtype                             |              |                    |                                       |           |
| Crohn's disease                         | 10,893       | 18                 | 1.65                                  | 1.58-1.72 |
| Ulcerative colitis or IBD, unclassified | 4490         | 13                 | 2.90                                  | 2.76-3.03 |
| Exposure to IBD drugs <sup>b</sup>      |              |                    |                                       |           |
| No treatment or 5-amino-salicylates     | 5,773        | 4                  | 0.69                                  | 0.63-0.76 |
| Systemic corticosteroids                | 934          | 1                  | 1.07                                  | 0.87-1.27 |
| Immunomodulators <sup>c</sup>           | 4,836        | 20                 | 4.14                                  | 4.00-4.27 |
| Anti-TNF agents                         | 3,840        | 6                  | 1.56                                  | 1.45-1.68 |

IBD, inflammatory bowel disease; SVI, serious viral infection; TNF, tumor necrosing factor;

<sup>a</sup>At entry into the observation period

<sup>b</sup>Maximal treatment, according to MICISTA IBD drug scale (see Method section) during the calendar year of occurrence of SVI

<sup>c</sup>Thiopurines or methotrexate.

**Supplementary Table 3.** Characteristics of cases and controls in the case-control study nested in the MICISTA database for assessing risk factors for SVI.

|                                               | Patients with SVI<br>(n=31) | Control group<br>(n= 124) | <i>P</i> value |
|-----------------------------------------------|-----------------------------|---------------------------|----------------|
| Male sex, n ( %)                              | 14 (45.2)                   | 56 (45.2)                 | 1              |
| BMI (IQR)                                     | 21.3 (19.4-23.8)            | 21.6 (19.7-24.0)          | .53            |
| BMI < 18.5 ( %)                               | 5 (16.1)                    | 22 (17.7)                 | 1              |
| BMI ≥ 30 ( %)                                 | 0 (0)                       | 3 (2.4)                   | 1              |
| Smokers, n ( %)                               | 7 (22.6)                    | 26 (21.0)                 | .81            |
| Age at onset of IBD, years (IQR)              | 20.6 (17.1-25.2)            | 20.9 (16.9-24.7)          | .83            |
| Crohn's disease,<br>n ( %)                    | 18 (58.1)                   | 72 (58.1)                 | 1              |
| Segments ever involved <sup>a</sup><br>n ( %) |                             |                           | .50            |
| L1                                            | 5 (27.8)                    | 15 (20.8)                 |                |
| L2                                            | 4 (22.2)                    | 22 (24.4)                 |                |
| L3                                            | 8 (44.4)                    | 34 (47.2)                 |                |
| L4                                            | 1 (5.6)                     | 1 (1.11)                  |                |
| perineal disease, n ( %)                      | 7 (22.3)                    | 20 (16.1)                 | .42            |
| UC or unclassified colitis<br>n ( %)          | 13(41.9)                    | 52(41.9)                  | 1              |
| Segments ever involved <sup>a</sup>           |                             |                           | .61            |
| E1                                            | 1 (7.6)                     | 3 (5.8)                   |                |
| E2                                            | 6 (46.2)                    | 19 (36.5)                 |                |
| E3                                            | 6 (46.2)                    | 30 (57.7)                 |                |

SVI, serious viral infection; BMI, body mass index; IQR, interquartile range; UC, ulcerative colitis

<sup>a</sup> At clinical onset of SVI in cases, according to Montreal classification
